1  
2  
3  
4  
5  
6  
7  
8  
9  
10  
11  
12  
13  
14  
15  
16  
17  
18  
19  
20  
21  
22  
23

**Seasonal phenology of Coffee Berry Borer (*Hypothenemus hampei* Ferrari) in Hawaii and  
the influence of weather on flight activity**

Melissa A. Johnson<sup>1,\*</sup> and Nicholas C. Manoukis<sup>1</sup>

<sup>1</sup>Daniel K. Inouye US Pacific Basin Agricultural Research Center, United States Department of  
Agriculture – Agricultural Research Service, Hilo, Hawaii, USA

\*Corresponding author

E-mail: [melissa.johnson@usda.gov](mailto:melissa.johnson@usda.gov) (MAJ)

24 **Abstract**

25

26 Coffee berry borer (CBB, *Hypothenemus hampei* Ferrari) is the most serious insect pest of coffee  
27 worldwide, yet little is known about its seasonal flight behavior or the effect that weather  
28 variables have on its activity. We sampled flying female CBB adults bi-weekly over a three-year  
29 period using red funnel traps baited with an alcohol lure at 14 commercial coffee farms on  
30 Hawaii Island to characterize seasonal phenology and the influence of five weather variables on  
31 flight activity. We captured almost 5 million Scolytid beetles during the sampling period, with  
32 81-93% of the trap catch comprised of CBB. Of the captured non-target beetles, the majority  
33 were tropical nut borer, black twig borer and a species of *Cryphalus*. Two major flight events  
34 were consistent across all three years: an initial emergence from January-April that coincided  
35 with early fruit development and a second flight during the harvest season from September-  
36 December. A linear regression showed a moderate but significant negative relationship between  
37 elevation and total trap catch. A generalized additive mixed model (GAMM) revealed that mean  
38 daily air temperature has the most significant (positive) effect on CBB flight, with most flight  
39 events occurring between 20-26 °C. Mean daily solar radiation also had a significant positive  
40 effect, while maximum daily relative humidity negatively influenced flight at values above  
41 ~94%. Flight was positively influenced by maximum daily wind speeds up to ~2.5 m/s and  
42 cumulative rainfall up to 100 mm, after which activity declined. Our findings provide important  
43 insight into CBB flight patterns across a highly variable landscape and will serve as a starting  
44 point for the development of flight prediction models.

45

46

47 **Introduction**

48

49 Coffee berry borer, *Hypothenemus hampei* (Ferrari) (Coleoptera: Curculionidae) is the most  
50 damaging insect pest of coffee worldwide, causing more than \$5M in annual crop losses [1]. The  
51 female coffee berry borer (CBB) initiates infestation when she bores an entrance hole into the  
52 coffee fruit (“berry”) and builds galleries for reproduction in the seed (“bean”). The offspring  
53 feed on the endosperm tissue, causing further damage to the bean and resulting in reduced  
54 quality and yields [1, 2]. Managing CBB is particularly difficult due to the cryptic nature of its  
55 life cycle which occurs almost entirely within the coffee berry. Male and female siblings mate  
56 within their natal berry, the males die, and mated females leave in search of a new berry to infest.  
57 This is the time when CBB are most vulnerable to chemical pesticides.

58

59 Strategies for managing CBB include chemical, biological, and cultural controls. Due to  
60 concerns for human and environmental health, chemical controls such as endosulfan and  
61 chlorpyrifos are being phased out or banned in many coffee-growing countries [3]. Sprays of the  
62 entomopathogenic fungus *Beauveria bassiana* are becoming more widely used as a sustainable  
63 replacement for these acutely toxic chemicals [4, 5, 6]. Biological control using parasitoids has  
64 also been implemented, particularly in Latin America, but with limited success due to the need  
65 for augmentative releases [7]. Cultural controls are typically the most cost-effective methods for  
66 managing CBB and include pruning, frequent and efficient harvesting, strip-picking all  
67 remaining berries at the end of the season, and sanitation of harvesting equipment and processing  
68 facilities [4, 5]. Integrated pest management (IPM) of CBB typically involves multiple  
69 components including sprays of *B. bassiana* early in the season, frequent and efficient

70 harvesting, and post-harvest sanitation; these have been shown to be effective for managing CBB  
71 in Hawaii [6, 8].

72

73 A critical aspect of most successful IPM programs is monitoring of pest activity with traps  
74 and/or infestation assessments. By identifying peaks in flight activity that coincide with berry  
75 colonization, coffee growers can maximize the efficiency of *B. bassiana* applications and thereby  
76 minimize costs. Traps are used in many countries to monitor CBB activity [9, 10, 11, 12] and  
77 mass-trapping using a high density of traps in an area has even been suggested as a possible  
78 method of control [13]. In Hawaii, traps were introduced soon after the initial CBB detection in  
79 2010 [14] as part of the IPM guidelines for managing this new invasive pest [15]. Traps were  
80 adopted by many growers in the early years of the invasion to monitor CBB activity in their  
81 fields. However, over time, fewer and fewer growers utilized traps with most transitioning to  
82 calendar sprays of *B. bassiana* or relying on casual observation of infestation in their fields to  
83 guide the timing of spray applications (A. Kawabata, pers. comm.). This approach has been  
84 shown to be inefficient: Hollingsworth et al. [6] reported that 3-5 sprays of *B. bassiana*  
85 conducted early in the season were just as effective as 8-12 calendar sprays, highlighting the  
86 importance of appropriately timing sprays for cost-effective control of CBB.

87

88 Understanding the seasonal phenology of CBB and the underlying abiotic drivers of flight are  
89 essential for predicting periods of high activity. Information on CBB population dynamics for a  
90 given coffee-growing region can be used to develop action thresholds and forecasting models for  
91 specific locations. This is especially important for Hawaii where the coffee-growing landscape is  
92 heterogeneous, and a single set of management recommendations is difficult to apply across the

93 entire region. Coffee is grown commercially on six of the main Hawaiian Islands on volcanic  
94 soils that vary in age and nutrient composition and experience a broad range of microclimate  
95 conditions from sea level to over 800 m in elevation [16]. On Hawaii Island, more than 800  
96 small farms produce coffee, most of which are family-run operations that rely on manual labor to  
97 harvest the coffee and implement management practices. Optimizing pest management strategies  
98 while minimizing costs are critical to the longevity of these farms as Hawaii has some of the  
99 highest labor and production costs of any coffee-growing region.

100

101 In the present study we monitored the flight activity of CBB using funnel traps at 14 commercial  
102 coffee farms in the two main coffee-growing regions of Hawaii Island, Kona and Ka‘u, over a  
103 three-year period. Five weather variables thought to be important for insect flight (temperature,  
104 relative humidity, solar radiation, wind speed and rainfall) were tracked at each site. Our  
105 objective was to provide insights into the seasonal phenology of CBB across a highly variable  
106 landscape, as well as to characterize the abiotic factors that trigger CBB flight, which will aid in  
107 the development of models for predicting future flight events. These models can serve as  
108 decision support tools to guide the timing of pesticide applications. While this study is focused  
109 on Hawaii, we expect that the information gained on CBB flight and associated weather  
110 variables will be useful for developing IPM strategies in other coffee-growing regions.

111

## 112 **Materials and Methods**

113

### 114 *Study Sites*

115

116 Fourteen commercial coffee farms were selected for the study on Hawaii Island. Eight farms  
117 were located on the West side of the island in the Kona district and six farms were on the  
118 Southeast side of the island in the Ka‘u district (Fig. 1). While coffee is grown throughout the  
119 Hawaiian Islands, Kona and Ka‘u are the two primary coffee-growing regions, both of which are  
120 world-renowned for the high quality of their coffee. Farms were selected to encompass the broad  
121 range of elevations and climatic conditions under which coffee is grown on Hawaii Island. In  
122 Kona, farms ranged in elevation from 204 m – 607 m and in Ka‘u farms ranged from 279 m –  
123 778 m in elevation. All farms were actively managed for coffee production throughout the study,  
124 although the timing and number of interventions varied. Management practices included regular  
125 pruning, weed management, fertilizer, pesticide application, cherry harvesting and end of season  
126 strip-picking. Farms were largely characterized as sun-grown although some farms had scattered  
127 fruit, nut or ornamental shade trees planted as well. All farms had *Coffea arabica* var. *typica*  
128 planted with the exception of one farm in Ka‘u which had primarily var. *catuai* planted.

129

130 **Figure 1.** Map of Hawaii Island showing 14 study sites (eight in the Kona district and 6 in the  
131 Ka‘u district). Inset map shows the main Hawaiian Islands and the location of Hawaii Island  
132 within the archipelago.

133

### 134 *Flight Activity*

135

136 Red funnel traps (CIRAD, Montpellier, France) baited with an alcohol lure (3:1  
137 methanol:ethanol) were randomly distributed throughout each farm. Trap density was based on  
138 farm size, with 3-5 traps used for small farms (1-1.4 ha) and 6-9 traps used for large farms (1.5-2

139 ha). Traps were hung on stakes at ~1 m in height and were equipped with a collection cup  
140 containing propylene glycol. Trap contents were collected in 70% ethanol on a bi-weekly  
141 schedule from 2016-2018. Lures were refilled as needed and propylene glycol was replaced bi-  
142 weekly. In the laboratory, trap contents were passed through a sieve (1.5 mm mesh size) to  
143 separate out all large insects, which were discarded (see [17] for additional details on trap setup,  
144 collection and processing). The remaining insects from each trap collection were placed under a  
145 stereomicroscope (Leica microsystems GmbH, Wetzlar, Germany). All Scolytine beetles were  
146 counted and CBB were separated from these other beetles to estimate trap specificity. If >500  
147 beetles were caught in a single trap, we used a volumetric method to estimate count (see [17] for  
148 details). For each site, the number of CBB per trap per day (CBB/trap/day) was estimated by  
149 dividing the total number of CBB caught by the number of traps in the farm and then dividing  
150 this by the number of days in the sampling period (14 days on average, although this varied  
151 occasionally). This calculation was also done to estimate the number of other Scolytid beetles  
152 caught per trap per day.

153

#### 154 *Weather Variables*

155

156 Manual or cell-service weather stations were set up at each farm to measure the following  
157 variables: air temperature, relative humidity (RH), rainfall, wind speed and solar radiation.  
158 Manual stations consisted of a Hobo Pro v2 temperature/RH data logger (U23-002, Onset  
159 Computer Corporation, Bourne MA) housed in a solar shield (RS3, Onset Computer  
160 Corporation, Bourne MA), a solar pendant (UA-002-64, Onset Computer Corporation, Bourne  
161 MA) and a rain gauge equipped with a manual data logger (RainLog 2.0, RainWise Inc.). Cell-

162 service weather stations were comprised of a 4G remote monitoring station (RX3004-00-01,  
163 Onset Computer Corporation, Bourne MA) equipped with a temperature/RH sensor (S-THB-  
164 M002), solar panel (SOLAR-5W), solar radiation sensor (S-LIB-M003) placed within a solar  
165 shield (RS3-B) and rain gauge (S-RGB-M002). Wind speed sensors (S-WSET-B) were added to  
166 each cell-service station in 2018. For each site, the daily maximum, mean, and minimum were  
167 estimated for air temperature and RH in R v. 3.5.0 using the ‘aggregate’ function in the *stats*  
168 package [18]. We used the same method to estimate the daily mean and maximum wind speed  
169 and solar radiation, as well as daily cumulative rainfall. We then used these daily values to  
170 calculate the average air temperature ( $^{\circ}\text{C}$ ), RH (%), wind speed (m/s) and solar radiation ( $\text{W m}^{-2}$ ),  
171 as well as the cumulative rainfall (mm) for each ~bi-weekly sampling period.

172

### 173 *Data Analysis*

174

175 All statistical analyses were conducted in R v.3.5.0 [18]. The assumption of normality for each  
176 variable was validated using quantile-quantile plots and a Shapiro-Wilks test; an *F* test was  
177 conducted to assess for equal variances using the *stats* package. A Pearson correlation test was  
178 conducted using the *stats* package to examine the relationship between total CBB capture for  
179 each year/site and elevation. The mean number of CBB caught per trap per day was log-  
180 transformed ( $\log + 1$ ) prior to analysis. Linearity of the relationship between CBB/trap/day and  
181 each weather variable was also checked prior to analysis using two-dimensional scatterplots.  
182 Given the non-linear nature of the relationship between weather variables and CBB flight, the  
183 influence of weather on CBB flight activity was evaluated with a generalized additive mixed  
184 model (GAMM) in the *mgcv* package v. 1.8-23 [19].



185  
186 The response variable for the model was the log-transformed mean number of CBB/trap/day,  
187 with year and site included as random effects and the weather variables included as fixed effects  
188 with cubic regression splines. We assumed a gaussian error distribution and an identity link  
189 function for the model. We used the generalized cross-validation (GCV) score to measure model  
190 smoothness with respect to the smoothing parameters as well as the estimate prediction error. A  
191 lower GCV score indicates a smoother model and is somewhat comparable to an Akaike  
192 Information Criterion (AIC) value, in that a lower score equates to a better fitting model.  
193 Pairwise Pearson correlation tests of continuous explanatory variables were conducted to assess  
194 multicollinearity at a correlation coefficient threshold of 0.7; maximum temperature, mean RH  
195 and maximum solar radiation were subsequently dropped from the model due strong correlations  
196 with mean temperature, maximum RH and mean solar radiation, respectively.

197

## 198 **Results**

199

200 In total, just under 5 million Scolytid beetles were captured over a period of 143 weeks. Across  
201 all 14 sites, CBB made up an average of 81% of the total trap catch in 2016, 91% in 2017, and  
202 93% in 2018 (Fig. 2). The most trapped non-CBB beetles were *Hypothenemus obscurus* F.  
203 (tropical nut borer), *Xylosandrus compactus* Eich. (black twig borer) and a species of bark beetle  
204 tentatively identified to the genus *Cryphalus* Erichson. Peak activity for non-CBB beetles was in  
205 the summer months of June and July. Farms observed to have higher percentages of non-CBB  
206 beetles in traps were located next to macadamia nut orchards or forests or had other fruit and nut  
207 trees interplanted with the coffee. The combined CBB catch across all sites was similar for 2017

208 (~1.98M CBB) and 2018 (~2.05M CBB), but considerably lower for 2016 (~600K CBB) given  
209 that data collection did not start until March (Kona) and May (Ka‘u), thereby missing the initial  
210 emergence for that year.

211

212 **Figure 2.** Total trap catch across three years on Hawaii Island. Study sites are in order of  
213 increasing elevation from left to right. Black bars represent coffee berry borer (CBB) while gray  
214 bars represent other Scolytid beetles.

215

216 Although variation was observed among years and farms in terms of the average number of  
217 CBB/trap/day, the general pattern of flight was consistent (Fig. 3). Seasonal phenology was  
218 observed in two stages: an initial emergence from January-April which coincides with early fruit  
219 development, and a secondary flight which occurs from September-December and coincides with  
220 the harvest season (Fig. 3). This secondary flight corresponds to the emergence of new  
221 generations of CBB that were the offspring of the initial colonizing females. Although we did not  
222 observe any consistent differences in trap capture patterns among farms in the Kona vs. Ka‘u  
223 regions, a linear regression revealed a moderate but significant negative correlation between  
224 elevation and total trap catch ( $R = -0.48$ ,  $t = -3.39$ ,  $p = 0.002$ ) (Fig. 4).

225

226 **Figure 3.** Seasonal flight phenology of coffee berry borer (CBB) on Hawaii Island over a three-  
227 year period. Sampling began in March 2016 and ended in December 2018. Error bars show the  
228 variation across 14 study sites.

229

230 **Figure 4.** Linear regression showing a moderate but significant negative relationship between  
231 the log-transformed total CBB capture for each site/year and elevation ( $R = -0.48$ ,  $p = 0.002$ ).  
232  
233 The final GAMM explained 75.7% of the deviance (adjusted  $R^2 = 0.66$ ,  $GCV = 0.29$ ), with the  
234 following weather variables having a significant effect on CBB flight at an  $\alpha < 0.05$ : mean  
235 temperature, maximum RH, cumulative rainfall, maximum wind, and mean solar radiation  
236 (Table 1). Mean daily temperature had the greatest positive effect on CBB flight (Table 1) with  
237 three peaks observed between 20-26 °C (Fig. 5A). Mean daily solar radiation also had a positive  
238 effect on CBB flight, with peaks observed at 200-300  $W/m^2$  and 400-500  $W/m^2$  (Fig. 5A).  
239 Flight levels were generally high at maximum daily RH values between 80-94%, after which  
240 they fell sharply (Fig. 5B). Cumulative rainfall had a positive effect on CBB flight up to 100  
241 mm, after which flight decreased (Fig. 5B). Flight increased up to maximum daily wind speeds  
242 of ~2.5 m/s and subsequently dropped off (Fig. 5C). Both the random effects of site ( $p < 0.001$ )  
243 and year ( $p = 0.003$ ) also had significant effects on CBB flight (Table 1).

244

245 **Figure 5.** Results from a generalized additive mixed model (GAMM) exploring the effects of  
246 mean daily temperature (A, C), mean solar radiation (A), maximum relative humidity (B),  
247 cumulative rainfall (B) and maximum wind speed (C) on coffee berry borer flight activity.  
248 Three-dimensional contour plots show peaks in CBB flight activity in yellow and decreased  
249 activity in cooler colors (green and blue).

250

251 **Table 1.** Results from the generalized additive mixed model (GAMM) analyzing the influence of  
252 five independent weather variables (fixed effects) and site and year (random effects) on CBB  
253 flight.

254

| Variable            | edf   | ref.df | F     | p-value                  |
|---------------------|-------|--------|-------|--------------------------|
| Mean Temperature    | 8.432 | 8.870  | 5.868 | 5.07e <sup>-07</sup> *** |
| Minimum Temperature | 2.138 | 2.824  | 1.081 | 0.282                    |
| Maximum RH          | 8.062 | 8.580  | 3.504 | 0.001**                  |
| Minimum RH          | 4.075 | 4.960  | 1.991 | 0.096                    |
| Mean Solar          | 5.064 | 5.898  | 3.234 | 0.005**                  |
| Cumulative Rain     | 7.737 | 8.355  | 2.815 | 0.006**                  |
| Maximum Wind        | 8.695 | 8.948  | 2.277 | 0.015*                   |
| Mean Wind           | 2.648 | 3.439  | 1.693 | 0.184                    |
| Site                | 7.237 | 8.000  | 8.520 | 1.21e <sup>-10</sup> *** |
| Year                | 0.849 | 1.000  | 8.834 | 0.003**                  |

255 Legend: edf – effective degrees of freedom; ref.df – reference degrees of freedom; F – *F*-

256 statistic; p-values were considered significant at the following levels: < 0.001 ‘\*\*\*’, < 0.01 ‘\*\*’,

257 < 0.05 ‘\*’.

258

## 259 Discussion

260

261 Determining the seasonal phenology and abiotic factors involved in flight activity is a critical  
262 step in developing an integrated pest management plan for invasive insects. In the present study  
263 we examined 14 commercial coffee farms in two coffee-growing districts on Hawaii Island to  
264 elucidate seasonal flight patterns and the influence of five weather variables on CBB flight. Our  
265 findings suggest that although there are differences from farm to farm, general patterns of CBB  
266 flight activity can be described across this highly variable landscape. We observed two major  
267 flight events that were consistent across all three years: an initial emergence from January-April  
268 that coincides with early fruit development and a secondary flight that occurs during the harvest

269 season from September-December. We also found that despite not having a species-specific lure,  
270 trap specificity was generally high with CBB making up 81-93% of the total trap catch across all  
271 farms.

272

273 These results correspond to findings from two earlier studies that examined CBB flight patterns  
274 on Hawaii Island. Messing [20] reported CBB flight from November-March at two farms in  
275 Kona. That study also found that 1:1 and 3:1 ratios of methanol:ethanol captured similar  
276 numbers of beetles, and that non-target beetles made up an insignificant proportion of trap catch  
277 relative to CBB (3-7 non-target beetles/trap/day compared to 100-400 CBB/trap/day). Our  
278 findings are also in line with those of Aristizábal et al. [21], who examined flight activity at 15  
279 farms in Kona and Ka'u using 3:1 methanol:ethanol baited funnel traps. That study reported a  
280 small peak in flight from May-July and a larger peak from December-February. The authors  
281 suggested that peaks appeared to coincide with increased levels of rainfall following a dry  
282 period, although weather data was not available for each farm, excluding statistical analyses.  
283 Aristizábal et al. [21] also estimated that non-target insects made up < 5% of all trap catch based  
284 on subsampling from a few farms. While these earlier studies provided initial insights into  
285 seasonal flight trends in Hawaii, sampling was limited to a one-year period and did not include  
286 site-specific data on weather. In the present study we were able to expand on these initial  
287 findings by collecting data over multiple years and correlating flight activity to five individual  
288 weather variables at each farm. Below we summarize our main findings with respect to the  
289 influence of weather variables on trap catch, our proxy for flight activity.

290

291 Mean daily air temperature was observed to be the single weather variable with the strongest  
292 (positive) relationship to CBB flight activity across all sites. This is relatively unsurprising since  
293 insects are poikilotherms, meaning their body temperature depends on ambient environmental  
294 temperature. Many aspects of insect biology are driven by temperature including generation  
295 length, rate of development, mating activity and dispersal [22]. It is widely reported that insects  
296 actively regulate body temperature before and during flight by behavioral or physiological means  
297 [23; 24; 25; 26; 27; 28; 29], and that there is a lower and upper temperature threshold for flight  
298 [30]. Insects need warm temperatures to initiate and maintain flight as it becomes difficult at  
299 lower temperatures to generate heat [27, 31, 32, 33]. As air temperatures increase, the  
300 aerodynamic force and mechanical power output of insects is also increased along with wing  
301 beat frequency [34, 35].

302  
303 Chen and Seybold [36] reported a lower threshold of 11 °C, an optimum of 27 °C and an upper  
304 threshold of 39 °C for the walnut twig beetle (*Pityophthorus juglandis* Blackman). In a  
305 controlled laboratory setting with RH held at 90% and 100%, Baker et al. [37] reported low CBB  
306 emergence from dried berries at temperatures below 20 °C, a marked increase in emergence from  
307 20-25 °C, and no significant increase above 25 °C. In the present study under highly variable  
308 field conditions, we observed that most flight events took place when mean daily temperatures  
309 were between 20-26 °C, with very few events below 16 °C or above 32 °C.

310  
311 Along with a positive effect of increasing temperature, we found a positive significant  
312 relationship between CBB flight and mean daily solar radiation. This is line with the findings of  
313 several studies that reported temperature and solar radiation as the main abiotic factors positively

314 influencing beetle flight [36, 38, 39, 40]. Related to this, we also observed a significant negative  
315 correlation between elevation and total CBB capture. Hamilton et al. [41] showed that CBB  
316 development on Hawaii Island is faster at low elevations primarily due to higher temperatures at  
317 these locations. The authors estimated 4-5 generations per season at low elevations (200-300 m),  
318 compared to 2-3 generations per season at high elevations (600-800 m). Thus, the higher  
319 abundance of CBB caught at lower elevations is directly related to the shorter development times  
320 at these sites.

321  
322 In accordance with numerous studies on insect flight, we observed a significant negative effect  
323 of maximum daily relative humidity above ~94%. CBB may be reluctant to leave the berries  
324 during periods of very high RH as this may indicate rain (along with an associated drop in  
325 barometric pressure, not measured in the current study), causing them to shelter. In addition,  
326 greater CBB mortality can occur during periods of high RH due to proliferation of *B. bassiana*  
327 under moist, humid conditions. Lastly, at very high RH there is a higher requirement of wing-  
328 beat frequency, which is metabolically costly [23, 29]. Farnworth [42] showed that *Periplaneta*  
329 *americana* Linnaeus had a higher wing beat frequency at 95% RH compared to 50% RH at  
330 temperatures between 27-35 °C, which could reflect greater effort to dissipate heat at high vs.  
331 low humidity. In contrast to our findings, under laboratory conditions with temperature held at  
332 25 °C, Baker et al. [37] described high CBB emergence from infested two-month-old berries at  
333 RH values of 20% and 55%, minimum emergence at 78% and 90%, and a steady increase in  
334 emergence from 94-100%. It is likely that differences between this study and our findings are  
335 related to the setting under which emergence was estimated. We did not observe a minimum RH  
336 lower than 52%, and mean RH values ranged from 80-90% for most sites/years. Maximum RH

337 values were typically >94% through spring and summer and dropped during the winter months  
338 (November-March), which coincided with peak CBB flight.

339

340 We observed a similar trend for maximum wind speed, with flight increasing at wind speeds up  
341 to ~2.5 m/s and then decreasing at speeds above that value. Chen and Seybold [36] reported that  
342 *P. juglandis* flight was limited at very low wind speeds and peaked when temperature was ~30  
343 °C and wind speed was 2 km/h. Pawson et al. [43] reported low flight activity of the bark beetle  
344 *Hylurgus ligniperda* Fabricius at very low wind speeds, an increase with rising wind speeds, and  
345 a peak at 2 m/s. Thus, some wind may help to initiate flight as well as provide olfactory cues to  
346 allow detection of resources, but at very high wind speeds flight appears to be inhibited. The  
347 long-distance dispersal of many weak-flying smaller insects is dictated mostly by wind [44, 45,  
348 46], which may explain the tendency of CBB to fly near the ground (M. Johnson, unpub. data)  
349 where ambient wind speeds are generally low [47]. Lastly, cumulative rainfall had a positive  
350 effect on CBB flight up to a point; flight appeared to be inhibited during periods of heavy rainfall  
351 (>100 mm). Other studies have reported negative effects of heavy rainfall on bark beetle flight  
352 [48, 49, 50]; the very small size of CBB likely precludes its movement during periods of  
353 inundation.

354

355 By considering the phenology of the coffee crop and the CBB together with the trap catches  
356 reported here, the pattern of CBB movement in Hawaii coffee plantations comes into focus. At  
357 the very beginning of the year the new coffee crop must become mature enough (>20% dry  
358 matter content [51, 52, 53]) to be infested by the previous season's beetles. These CBB are  
359 mostly in raisins (dried berries) on the ground under the coffee trees or on the raisins remaining



360 on the branches- the latter being the most heavily infested repositories on a per-bean basis [54].  
361 The first flight suggests movement from these refugia into developing green berries in the first  
362 quarter of the calendar year. Given that few berries may be available early in the season, CBB  
363 will have to travel more extensively to find suitable hosts. Once a suitable berry is located, the  
364 female CBB will penetrate the exocarp and wait to complete entry into the coffee bean until  
365 conditions are suitable, or may begin boring immediately into the seed depending on fruit stage  
366 [1].

367  
368 After the first flight, CBB begin reproducing within the beans and berry development continues.  
369 During this middle part of the year, there is very little baseline movement of CBB and trap  
370 catches are low since the host berries are abundant. The second major flight, observed here in the  
371 last quarter of the calendar year, is likely driven by waning food supplies in the original berries  
372 (as the numbers of CBB increase in the individual beans, food is reduced and movement again  
373 becomes necessary) in combination with physical disturbance during harvesting, strip-picking  
374 and tree pruning. Based on observations of lower flight activity in this second part of the year in  
375 feral and unmanaged sites vs. well-managed sites on Hawaii Island [55], physical disturbance via  
376 management practices are a larger stimulus for this second flight relative to the need to locate  
377 food, which is the primary stimulus for the first flight of the season.

378

## 379 **Conclusions**

380

381 Our investigation into CBB seasonal phenology and the influence of weather on CBB flight  
382 activity revealed important insights that will be useful for the development of future flight

383 prediction models. Seven of the 10 variables included in the GAMM were found to have a  
384 significant influence on CBB flight activity. Of the eight fixed effects, mean daily temperature,  
385 mean solar radiation, maximum RH, maximum wind speed and cumulative rainfall were  
386 significant, while both the random effects of site and year also had a significant effect on flight.  
387 Variation among years was likely due to a combination of weather events and the timing of study  
388 initiation, while variation among farms likely involved differences in management style, timing,  
389 and the number of interventions, as well as differences in CBB development times across  
390 elevations. That the best model explained only 75.7% of the observed variance likely reflects the  
391 absence of additional weather variables that were not measured such as barometric pressure, as  
392 well as variation that was missed due to sampling frequency. Given the large travel distance  
393 between sites, all traps were sampled on a bi-weekly schedule, such that correlating weather  
394 events to trap catch at finer scales was not possible. The timing of daily CBB flight and the  
395 weather events correlated with flight activity on an hourly basis are currently being examined at  
396 several sites on Hawaii Island to further elucidate flight patterns in this global pest of coffee.

397

## 398 **Acknowledgements**

399

400 Robbie Hollingsworth, Ray Carruthers and Luis Aristizábal made helpful suggestions on study  
401 design and methods. Many technical staff steadfastly collected the data required for this study,  
402 regularly under difficult conditions. These included Matthew Mueller, Thomas Mangine, Samuel  
403 Fortna, Austin Bloch, Jaqueline Pitts, John Ross, Lori Carvalho, Shannon Wilson, Colby Maeda,  
404 Connor Rhyno and others. Special thanks to Forest Bremer for developing the electronic data  
405 collection system for our monitoring program. We are also grateful to the Kona and Ka‘u coffee

406 growers that allowed us to conduct this study on their farms. Opinions, findings, conclusions, or  
407 recommendations expressed in this publication are those of the authors and do not necessarily  
408 reflect the views of the USDA. The USDA is an equal opportunity provider and employer.

409

## 410 **References**

- 411 1. Vega FE, Infante F, Johnson AJ. The genus *Hypothenemus*, with emphasis on *H. hampei*,  
412 the coffee berry borer. In: Vega FE, Hofstetter RW, editors. Bark beetles: biology and  
413 ecology of native and invasive species. 1st ed. London, UK: Elsevier; 2015. pp. 427-494.
- 414 2. Duque OH, Baker PS. Devouring profit: the socio-economics of coffee berry borer  
415 IPM. *Chinchiná, The Commodities Press-CABI-CENICAFÉ*; 2003.
- 416 3. Johnson MA, Ruiz-Diaz CP, Manoukis NC, Verle Rodrigues JC. Coffee berry borer  
417 (*Hypothenemus hampei*), a global pest of coffee: perspectives from historical and recent  
418 invasions, and future priorities. *Insects* 2020; 11: 12.
- 419 4. Aristizábal LF, Bustillo AE, Arthurs SP. Integrated pest management of coffee berry  
420 borer: Strategies from Latin America that could be useful for coffee farmers in Hawaii.  
421 *Insects* 2016; 7: 6.
- 422 5. Aristizábal LF, Johnson MA, Shriner S, Hollingsworth R, Manoukis NC, Myers R,  
423 Bayman P, Arthurs SP. Integrated pest management of coffee berry borer in Hawaii and  
424 Puerto Rico: Current status and prospects. *Insects* 2017; 8: 123.
- 425 6. Hollingsworth RG, Aristizábal LF, Shriner S, Mascarin GM, Moral RDA, Arthurs SP.  
426 Incorporating *Beauveria bassiana* into an integrated pest management plan for Coffee  
427 Berry Borer in Hawaii. *Front. Sust. Food Systems* 2020; 4: 22.

- 428 7. Jaramillo J, Bustillo AE, Montoya EC, Borgemeister C. Biological control of the coffee  
429 berry borer *Hypothenemus hampei* (Coleoptera: Curculionidae) by *Phymastichus coffea*  
430 (Hymenoptera: Eulophidae) in Colombia. Bull. Entomol. Res. 2005; 95: 467-472.
- 431 8. Aristizábal-Aristizábal LF. Controlling the Coffee Berry Borer through Integrated Pest  
432 Management: A Practical Manual for Coffee Growers & Field Workers in Hawaii.  
433 Kailua-Kona, Hawaii, 2018; 79 pp.
- 434 9. Fernandes FL, Picanço MC, Campos SO, Bastos CS, Chediak M, Guedes RNC, da Silva  
435 RS. Economic injury level for the coffee berry borer (Coleoptera: Curculionidae:  
436 Scolytinae) using attractive traps in Brazilian coffee fields. J. Econ. Entomol. 2011; 104:  
437 1909–1917.
- 438 10. Fernandes FL, Picanço MC, Fernands MES, Dângelo RAC, Souza FF, Guedes RNC. A  
439 new and highly effective sampling plan using attractant-baited traps for the coffee berry  
440 borer (*Hypothenemus hampei*). J. Pest Sci. 2015; 88: 289-299.
- 441 11. Pereira AE, Vilela EF, Tinoco RS, de Lima JO, Fantine AK, Morais EG, Franca CF.  
442 Correlation between numbers captured and infestation levels of the coffee berry-borer,  
443 *Hypothenemus hampei*: a preliminary basis for an action threshold using baited traps. *Int.*  
444 *J. Pest Manage.* 2012; 58: 183-190.
- 445 12. Aristizábal LF, Jiménez M, Bustillo AE, Trujillo HI, Arthurs SP. Monitoring coffee berry  
446 borer, *Hypothenemus hampei* (Coleoptera: Curculionidae), populations with alcohol-  
447 baited funnel traps in coffee farms in Colombia. Florida Entomologist 2015; 98: 381-383.
- 448 13. Dufour B, Frérot B. Optimization of coffee berry borer, *Hypothenemus hampei* Ferrari  
449 (Col., Scolytidae), mass trapping with an attractant mixture. J. Appl. Entomol. 2008, 132:  
450 591-600.

- 451 14. Burbano E, Wright M, Bright DE, Vega FE. New record for the coffee berry borer,  
452 *Hypothenemus hampei*, in Hawaii. J. Insect Sci. 2011, 11.
- 453 15. Kawabata AM, Nakamoto ST, Curtiss RT. Recommendations for Coffee Berry Borer  
454 Integrated Pest Management in Hawai‘i 2015. UH-CTAHR, IP-33; 2016.
- 455 16. Bittenbender HC, Smith VE. Growing Coffee in Hawaii. Honolulu, HI, USA: College of  
456 Tropical Agriculture and Human Resources, University of Hawai‘i; 2008.
- 457 17. Johnson MA, Hollingsworth R, Fortna S, Aristizábal LF, Manoukis NC. The Hawaii  
458 protocol for scientific monitoring of coffee berry borer: a model for coffee  
459 agroecosystems worldwide. J. Visualized Exp. 2018; 133: e57204.
- 460 18. R Core Team. R: a language and environment for statistical computing. R Foundation for  
461 Statistical Computing. Vienna, Austria. 2018. Available from: <https://www.r-project.org/>
- 462 19. Wood SN. Fast stable restricted maximum likelihood and marginal likelihood  
463 estimation of semiparametric generalized linear models. J. Royal Statistical Society B  
464 2011; 73: 3-36.
- 465 20. Messing RH. The coffee berry borer (*Hypothenemus hampei*) invades Hawaii:  
466 Preliminary investigations on trap response and alternate hosts. Insects 2012; 3: 640-652.
- 467 21. Aristizábal LF, Shriner S, Hollingsworth R, Arthurs S. Flight activity and field infestation  
468 relationships for coffee berry borer in commercial coffee plantations in Kona and Ka‘u  
469 districts, Hawaii. J. Econ. Entomol. 2017; 110: 2421-2427.
- 470 22. Gaylord ML, Williams KK, Hofstetter RW, McMillin JD, Degomez TE, Wagner MR.  
471 Influence of temperature on spring flight initiation for southwestern ponderosa pine bark  
472 beetles (Coleoptera: Curculionidae, Scolytinae). Environ. Entomol. 2008; 37: 57-69.

- 473 23. Krogh A, Zeuthen E. The mechanism of flight preparation in some insects. J. Exp. Biol.  
474 1941; 18: 1-10.
- 475 24. Church NS. Heat loss and the body temperatures of flying insects. I. Heat loss by  
476 evaporation of water from the body. J. Exp. Biol. 1960; 37: 171-185.
- 477 25. Leston D, Pringle JWS, White DCS. Muscular activity during preparation for flight in a  
478 beetle. J. Exp. Biol. 1965; 62: 409-414.
- 479 26. Heinrich B. Temperature regulation of the sphinx moth, *Manduca sexta*. I. Flight  
480 energetics and body temperature during free and tethered flight. J. Exp. Biol. 1971; 54:  
481 141-152.
- 482 27. May ML. Insect thermoregulation. Ann. Rev. Entomol. 1979, 24: 313–349.
- 483 28. Coelho JR. The effect of thorax temperature on force production during tethered flight in  
484 honeybee (*Apis mellifera*) drones, workers, and queens. Physiol. Zool. 1991; 64: 823-  
485 835.
- 486 29. Klowden MJ. Physiological Systems in Insects. London, UK: Academic Press; 2002.
- 487 30. Fahrner SJ, Lelito JP, Aukema BH. The influence of temperature on the flight capacity of  
488 emerald ash borer *Agrilus planipennis* and its parasitoid, *Tetrastichus planipennisi*:  
489 Implications to biological control. BioControl 2015; 60: 437-449.
- 490 31. Rudinsky JA, Vité J. Effects of temperature upon the activity and the behavior of the  
491 Douglas-fir beetle. For. Sci. 1956; 2: 258-267.
- 492 32. Adams PA. How moths keep warm. Discovery 1969; 4: 83-88.
- 493 33. McCambridge WF. Temperature limits of flight of the mountain pine beetle,  
494 *Dendroctonus ponderosae*. Ann. Entomol. Soc. Am. 1971; 64: 534-535.

- 495 34. Stevenson RD, Josephson RK. Effects of operating frequency and temperature on  
496 mechanical power output from moth flight muscle. *J. Exp. Biol.* 1990; 149: 61-78.
- 497 35. Lehmann FO. Ambient temperature affects free-flight performance in the fruit fly  
498 *Drosophila melanogaster*. *J. Comp. Physiol. B* 1999; 169: 165-171.
- 499 36. Chen Y, Seybold SJ. Crepuscular flight activity of an invasive insect governed by  
500 interacting abiotic factors. *PLoS One* 2014; 9: p.e105945.
- 501 37. Baker PS, Barrera JF, Rivas A. Life-history studies of the coffee berry borer  
502 (*Hypothenemus hampei*, Scolytidae) on coffee trees in Southern Mexico. *J. Appl. Ecol.*  
503 1992; 29: 656-662.
- 504 38. Daterman GE, Rudinsky JA, Nagel WP. Flight patterns of bark and timber beetle. Oregon  
505 State University, Agricultural Experiment Station Technical Bulletin 1965; No. 87, 46pp.
- 506 39. Shepherd RF. Factors influencing the orientation and rates of activity of *Dendroctonus*  
507 *ponderosae* Hopkins (Coleoptera, Scolytidae). *Can. Entomol.* 1966; 98: 507-518.
- 508 40. Bonsignore CP, Bellamy C. Daily activity and flight behavior of adults of *Capnodis*  
509 *tenebrionis* (Coleoptera: Buprestidae). *Eur. J. Entomol.* 2007; 104: 425-431.
- 510 41. Hamilton LJ, Hollingsworth RG, Sabado-Halpern M, Manoukis NC, Follett PA, Johnson  
511 MA. Coffee berry borer (*Hypothenemus hampei*) (Coleoptera:Curculionidae)  
512 development across an elevational gradient on Hawaii Island: Applying laboratory  
513 degree-day predictions to natural field populations. *PLoS One* 2019; 14: e0218321.
- 514 42. Farnworth EG. Effects of ambient temperature, humidity, and age on wing-beat  
515 frequency of *Periplaneta* species. *J. Insect Physiol.* 1972, 18: 827-839.
- 516 43. Pawson SM, Marcot BG, Woodberry OG. Predicting forest insect flight activity: A  
517 Bayesian network approach. *PLoS One* 2017; 12: e0183464.

- 518 44. Hu G, Lim KS, Horvitz N, Clark SJ, Reynolds DR, Sapir N, *et al.* Mass seasonal  
519 bioflows of high-flying insect migrants. *Science* 2016; 354: 1584-1587
- 520 45. Wainwright CE, Stepanian PM, Reynolds RR, Reynolds AM. The movement of small  
521 insects in the convective boundary layer: Linking patterns to processes. *Scientific Reports*  
522 2017; 7: 5438.
- 523 46. Huestis DL, Dao A, Diallo M, Sanogo ZL, Samake D, Yaro AS, *et al.* Windborne long-  
524 distance migration of malaria mosquitoes in the Sahel. *Nature* 2019; 574: 404-408
- 525 47. Srygley RB, Dudley R. Optimal strategies for insects migrating in the flight boundary  
526 layer: Mechanisms and consequences. *Integrat. Compar. Biol.* 2008; 48: 119-133
- 527 48. Moser JC, Dell TR. Weather factors predicting flying populations of a clerid predator and  
528 its prey, the southern pine beetle. In: *Proceedings of the 2nd IUFRO Conference on*  
529 *Dispersal of Forest Insects: Evaluation, Theory and Management Implications;*  
530 *Washington State University: Washington, DC, USA; 1980. pp. 266–278.*
- 531 49. Aukema BH, Clayton MK, Raffa KF. Modeling flight activity and population dynamics  
532 of the pine engraver, *Ips pini*, in the Great Lakes region: Effects of weather and predators  
533 over short time scales. *Popul. Ecol.* 2005; 47: 61-69.
- 534 50. Sanguansub S, Buranapanichpan S, Beaver RA, Saowaphak T, Tanaka N, Kamata N.  
535 Influence of seasonality and climate on captures of wood-boring Coleoptera  
536 (Bostrichidae and Curculionidae (Scolytinae and Platypodinae)) using ethanol-baited  
537 traps in a seasonal tropical forest of northern Thailand. *J. Forest Res.* 2020; 25: 223-231.
- 538 51. Baker PS. Some aspects of the behavior of the coffee berry borer in relation to its control  
539 in southern Mexico (Coleoptera, Scolytidae). *Folia Entomol. Mexicana* 1984; 61: 9-24.
- 540 52. Baker PS. *The coffee berry borer in Colombia.* Wallingford, UK: CABI; 1999.



- 541 53. Bustillo AE, Cárdenas R, Villalba DA, Benavides P, Orozco J, Posada FJ. Manejo  
542 integrado de la broca del café *Hypothenemus hampei* (Ferrari) en Colombia. Chinchiná,  
543 Colombia: Centro Nacional de Investigaciones de Café (Cenicafé); 1998. 134 pp.
- 544 54. Johnson MA, Fortna S, Hollingsworth RG, Manoukis NC. Postharvest population  
545 reservoirs of coffee berry borer (Coleoptera: Curculionidae) on Hawai‘i Island. J. Econ.  
546 Entomol. 2019; 112: 2833-2841.
- 547 55. Johnson MA, Manoukis NC. Abundance of coffee berry borer in feral, abandoned, and  
548 managed coffee on Hawai‘i Island. J. Applied Entomol. 2020; 144: 920-928.

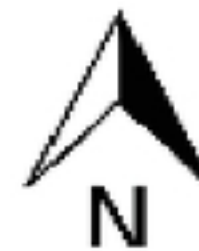

20° N

Kona

Ka'u

19° N

50 km

156° W

155° W

Hawai'i Island

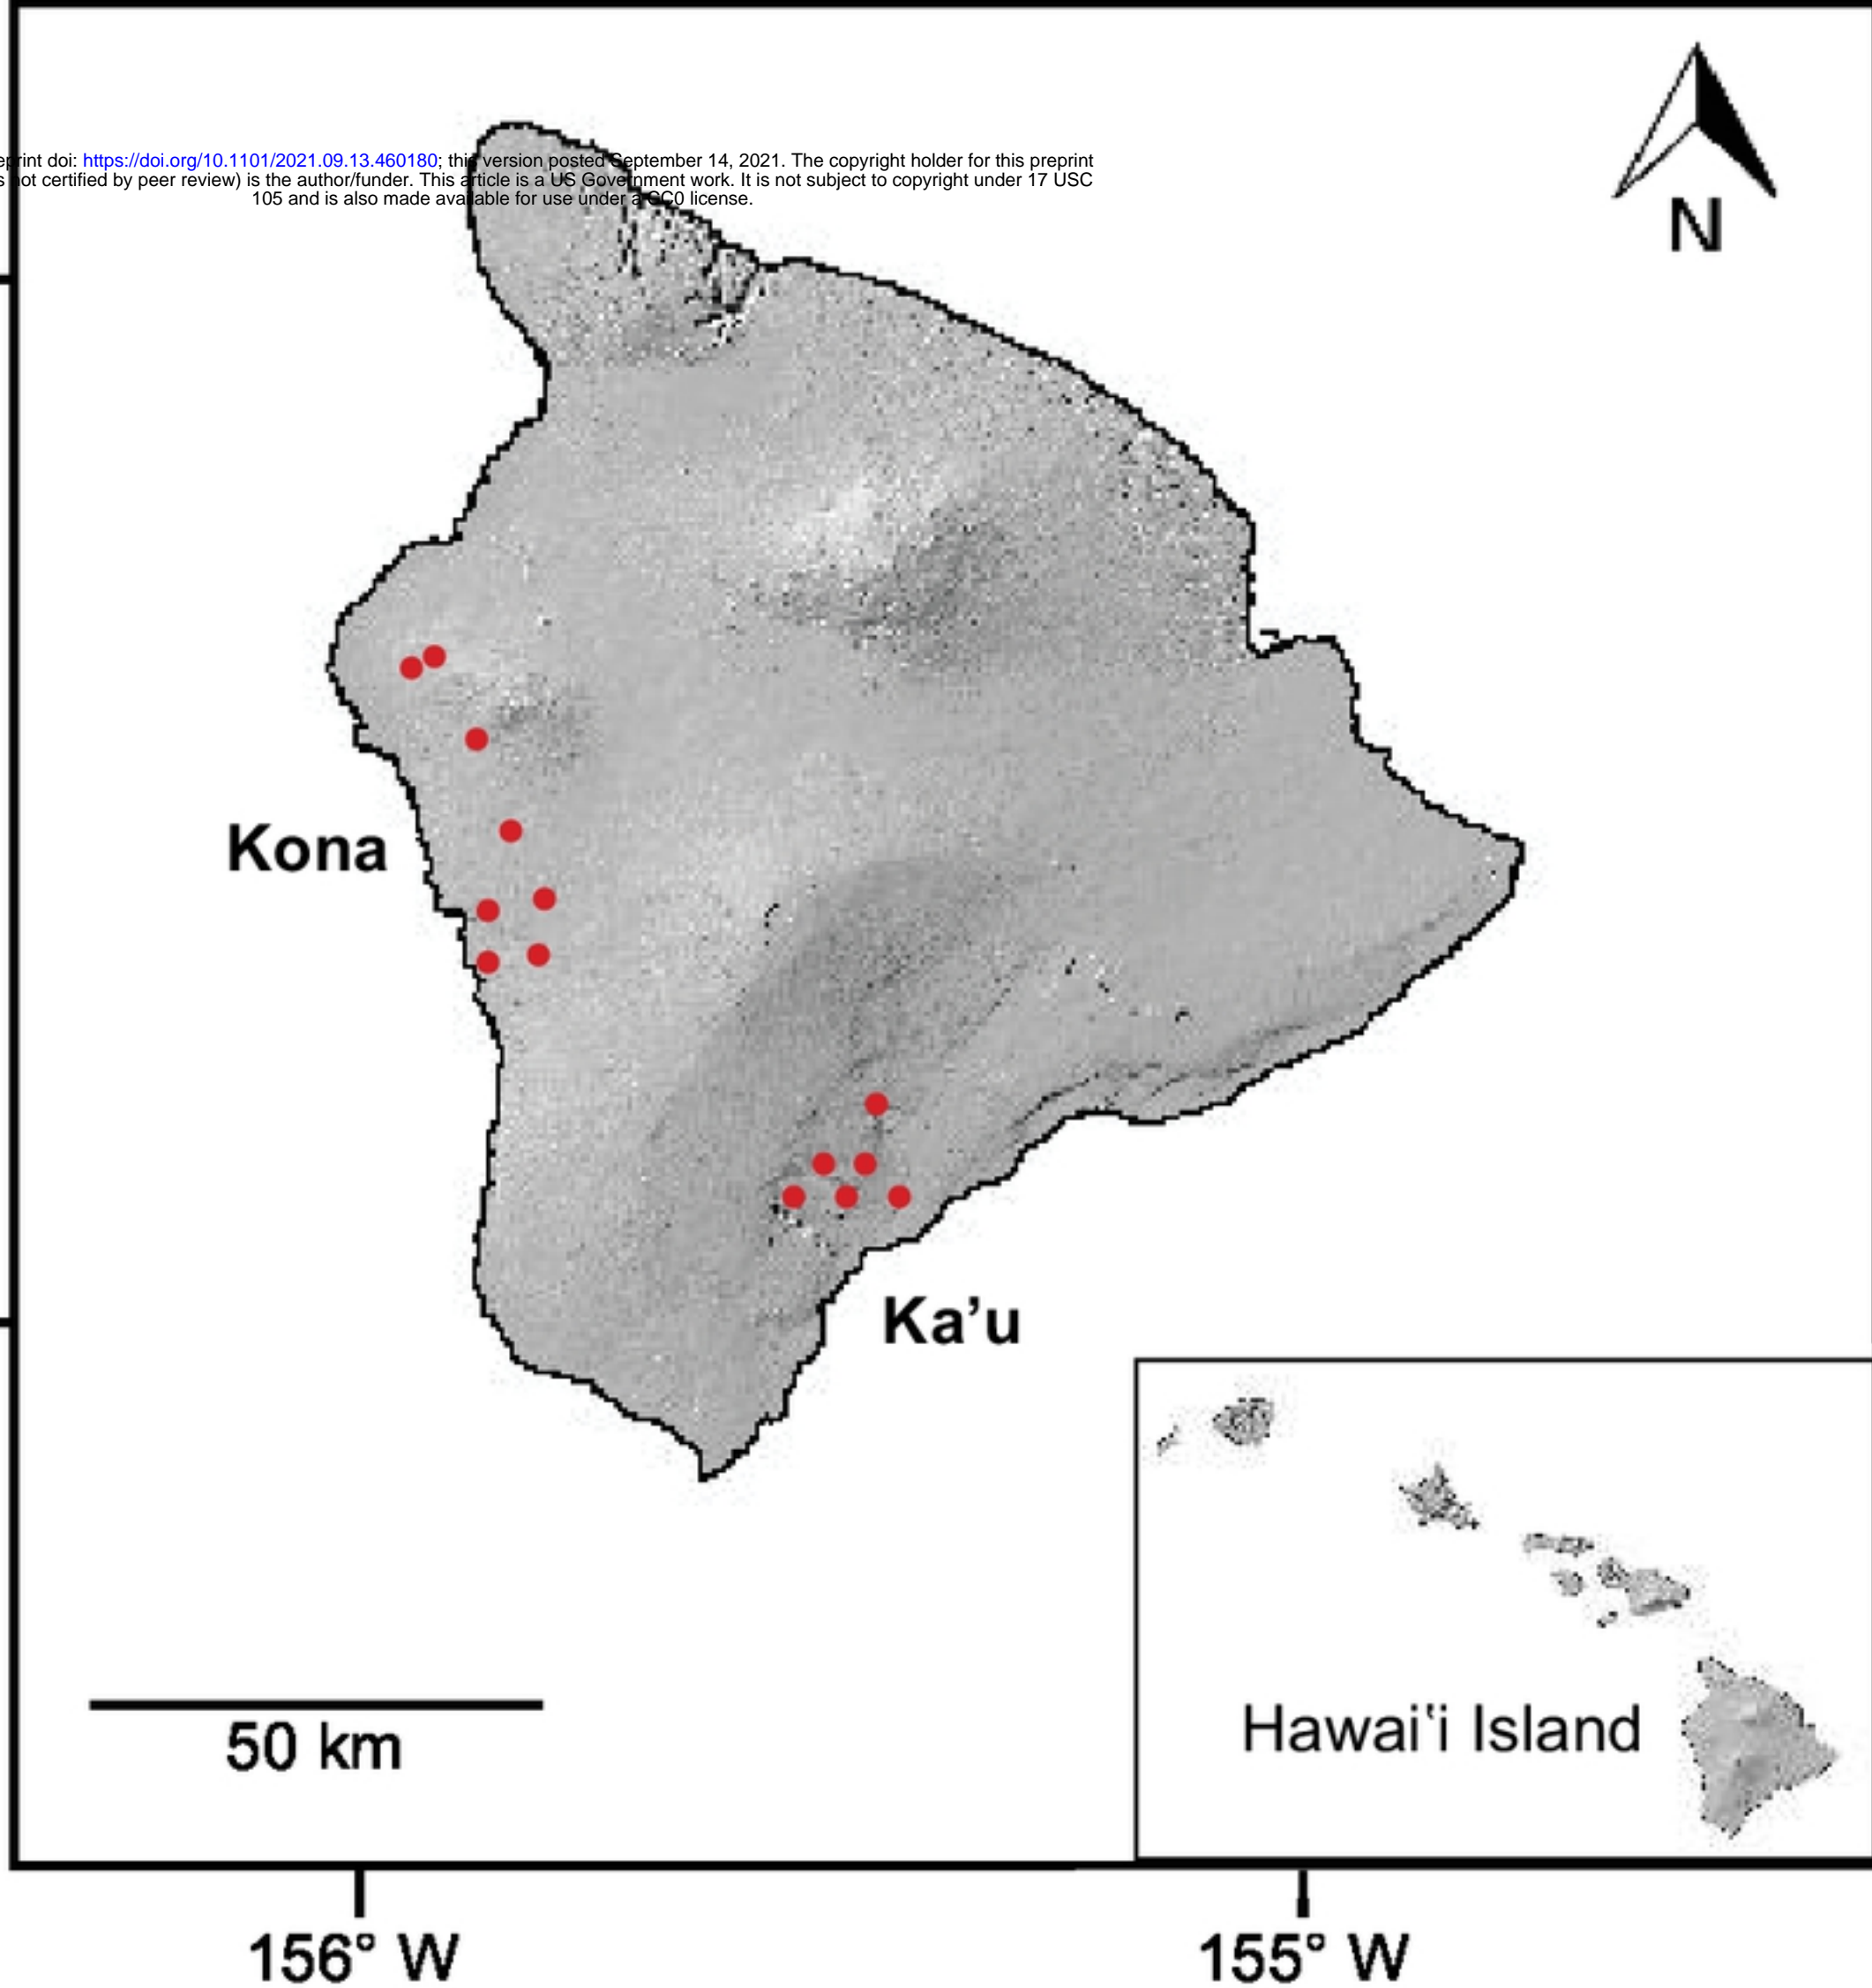

2016

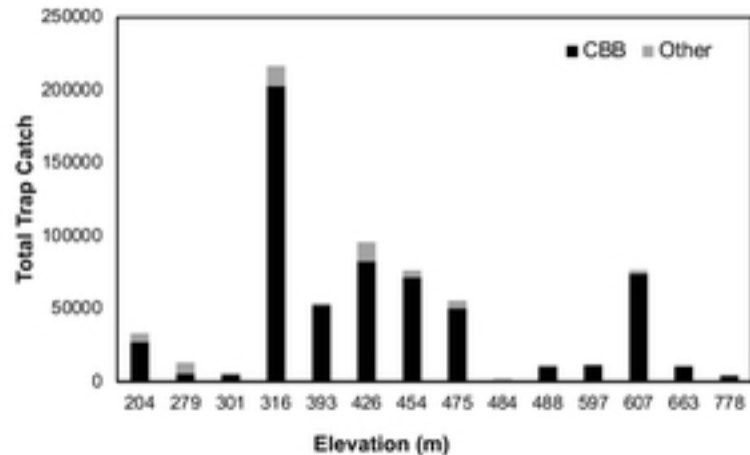

2017

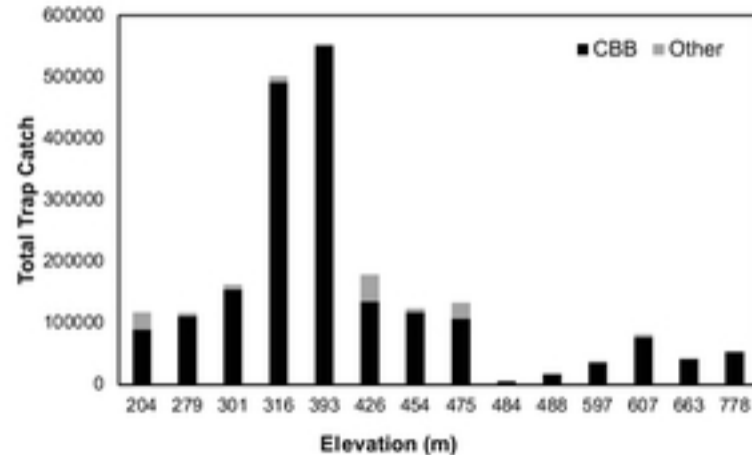

2018

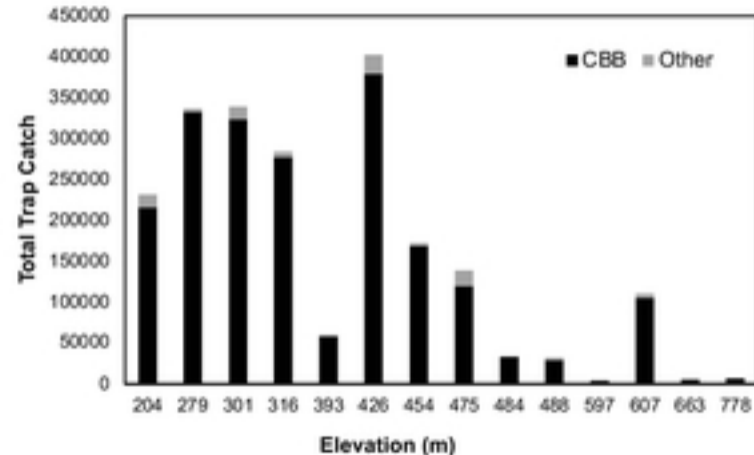

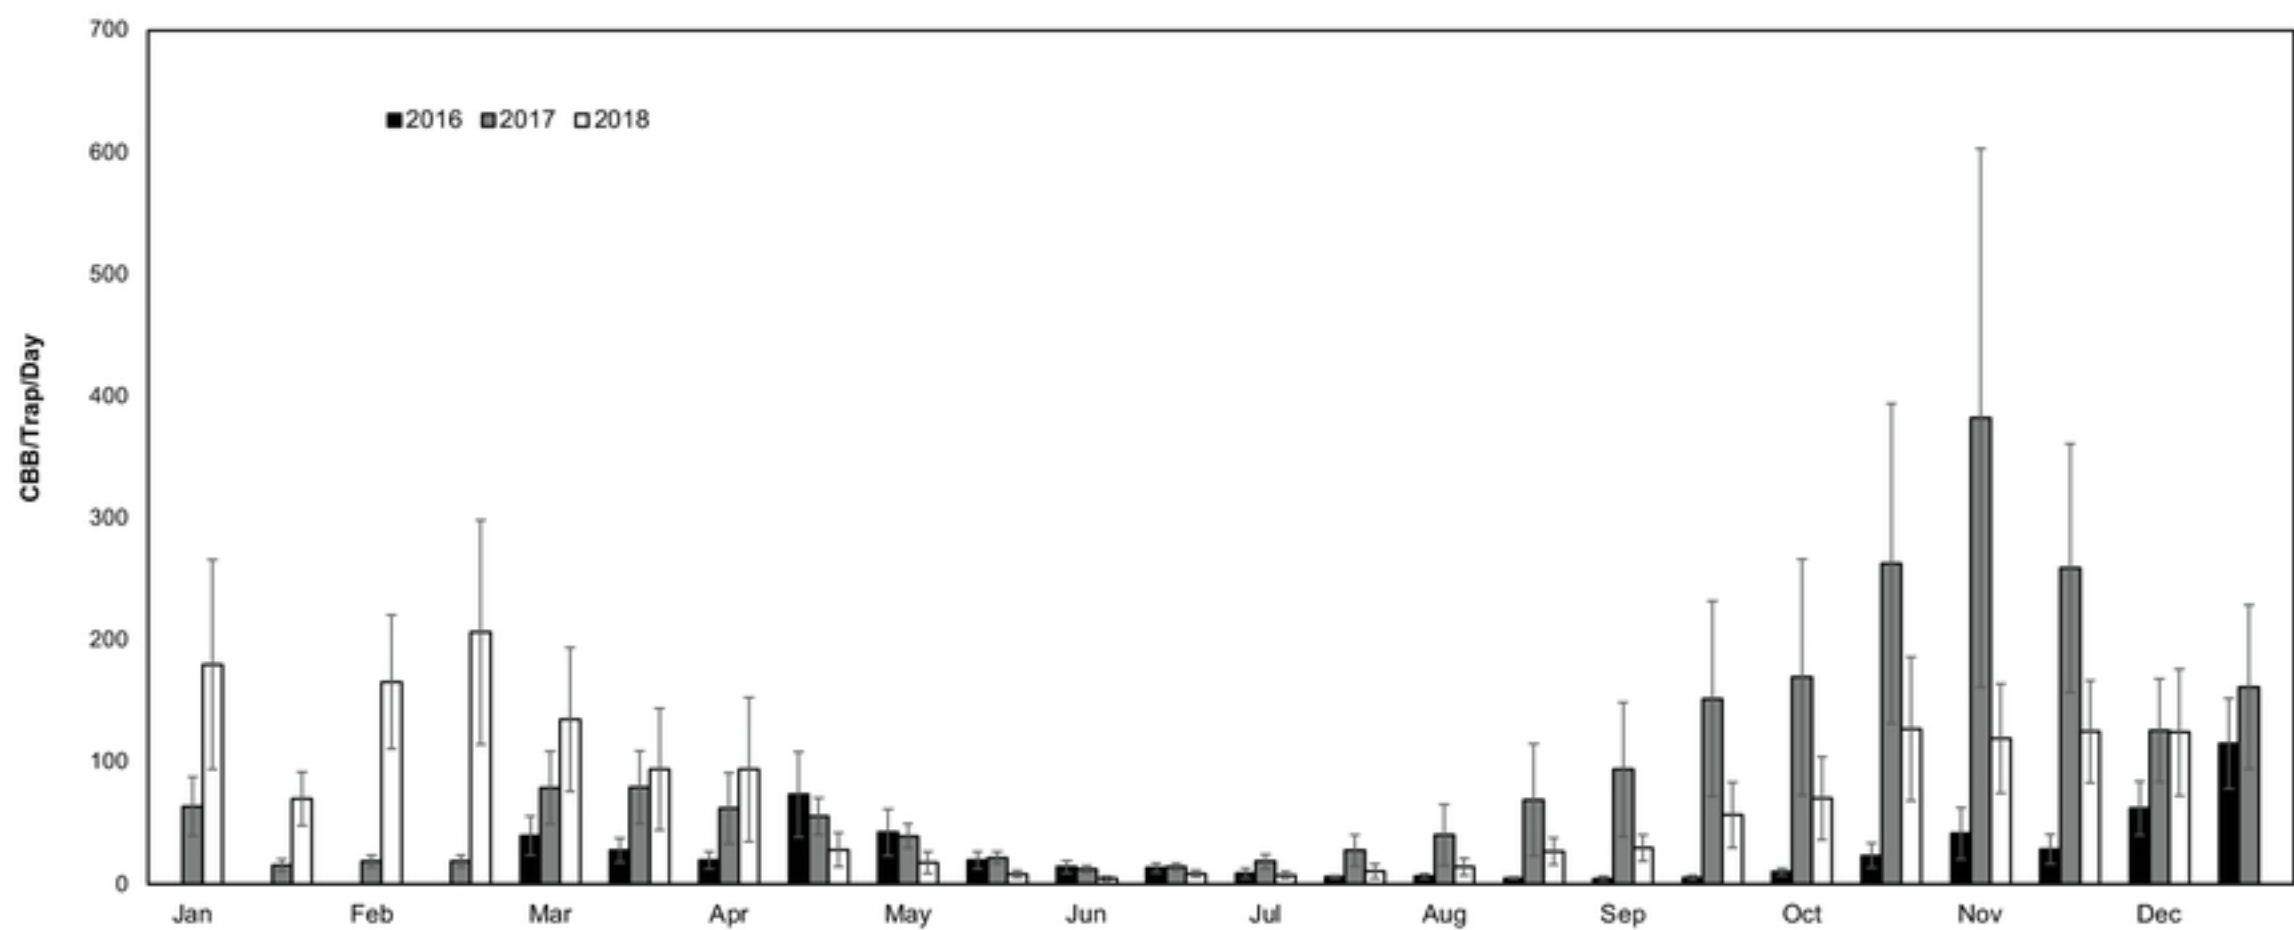

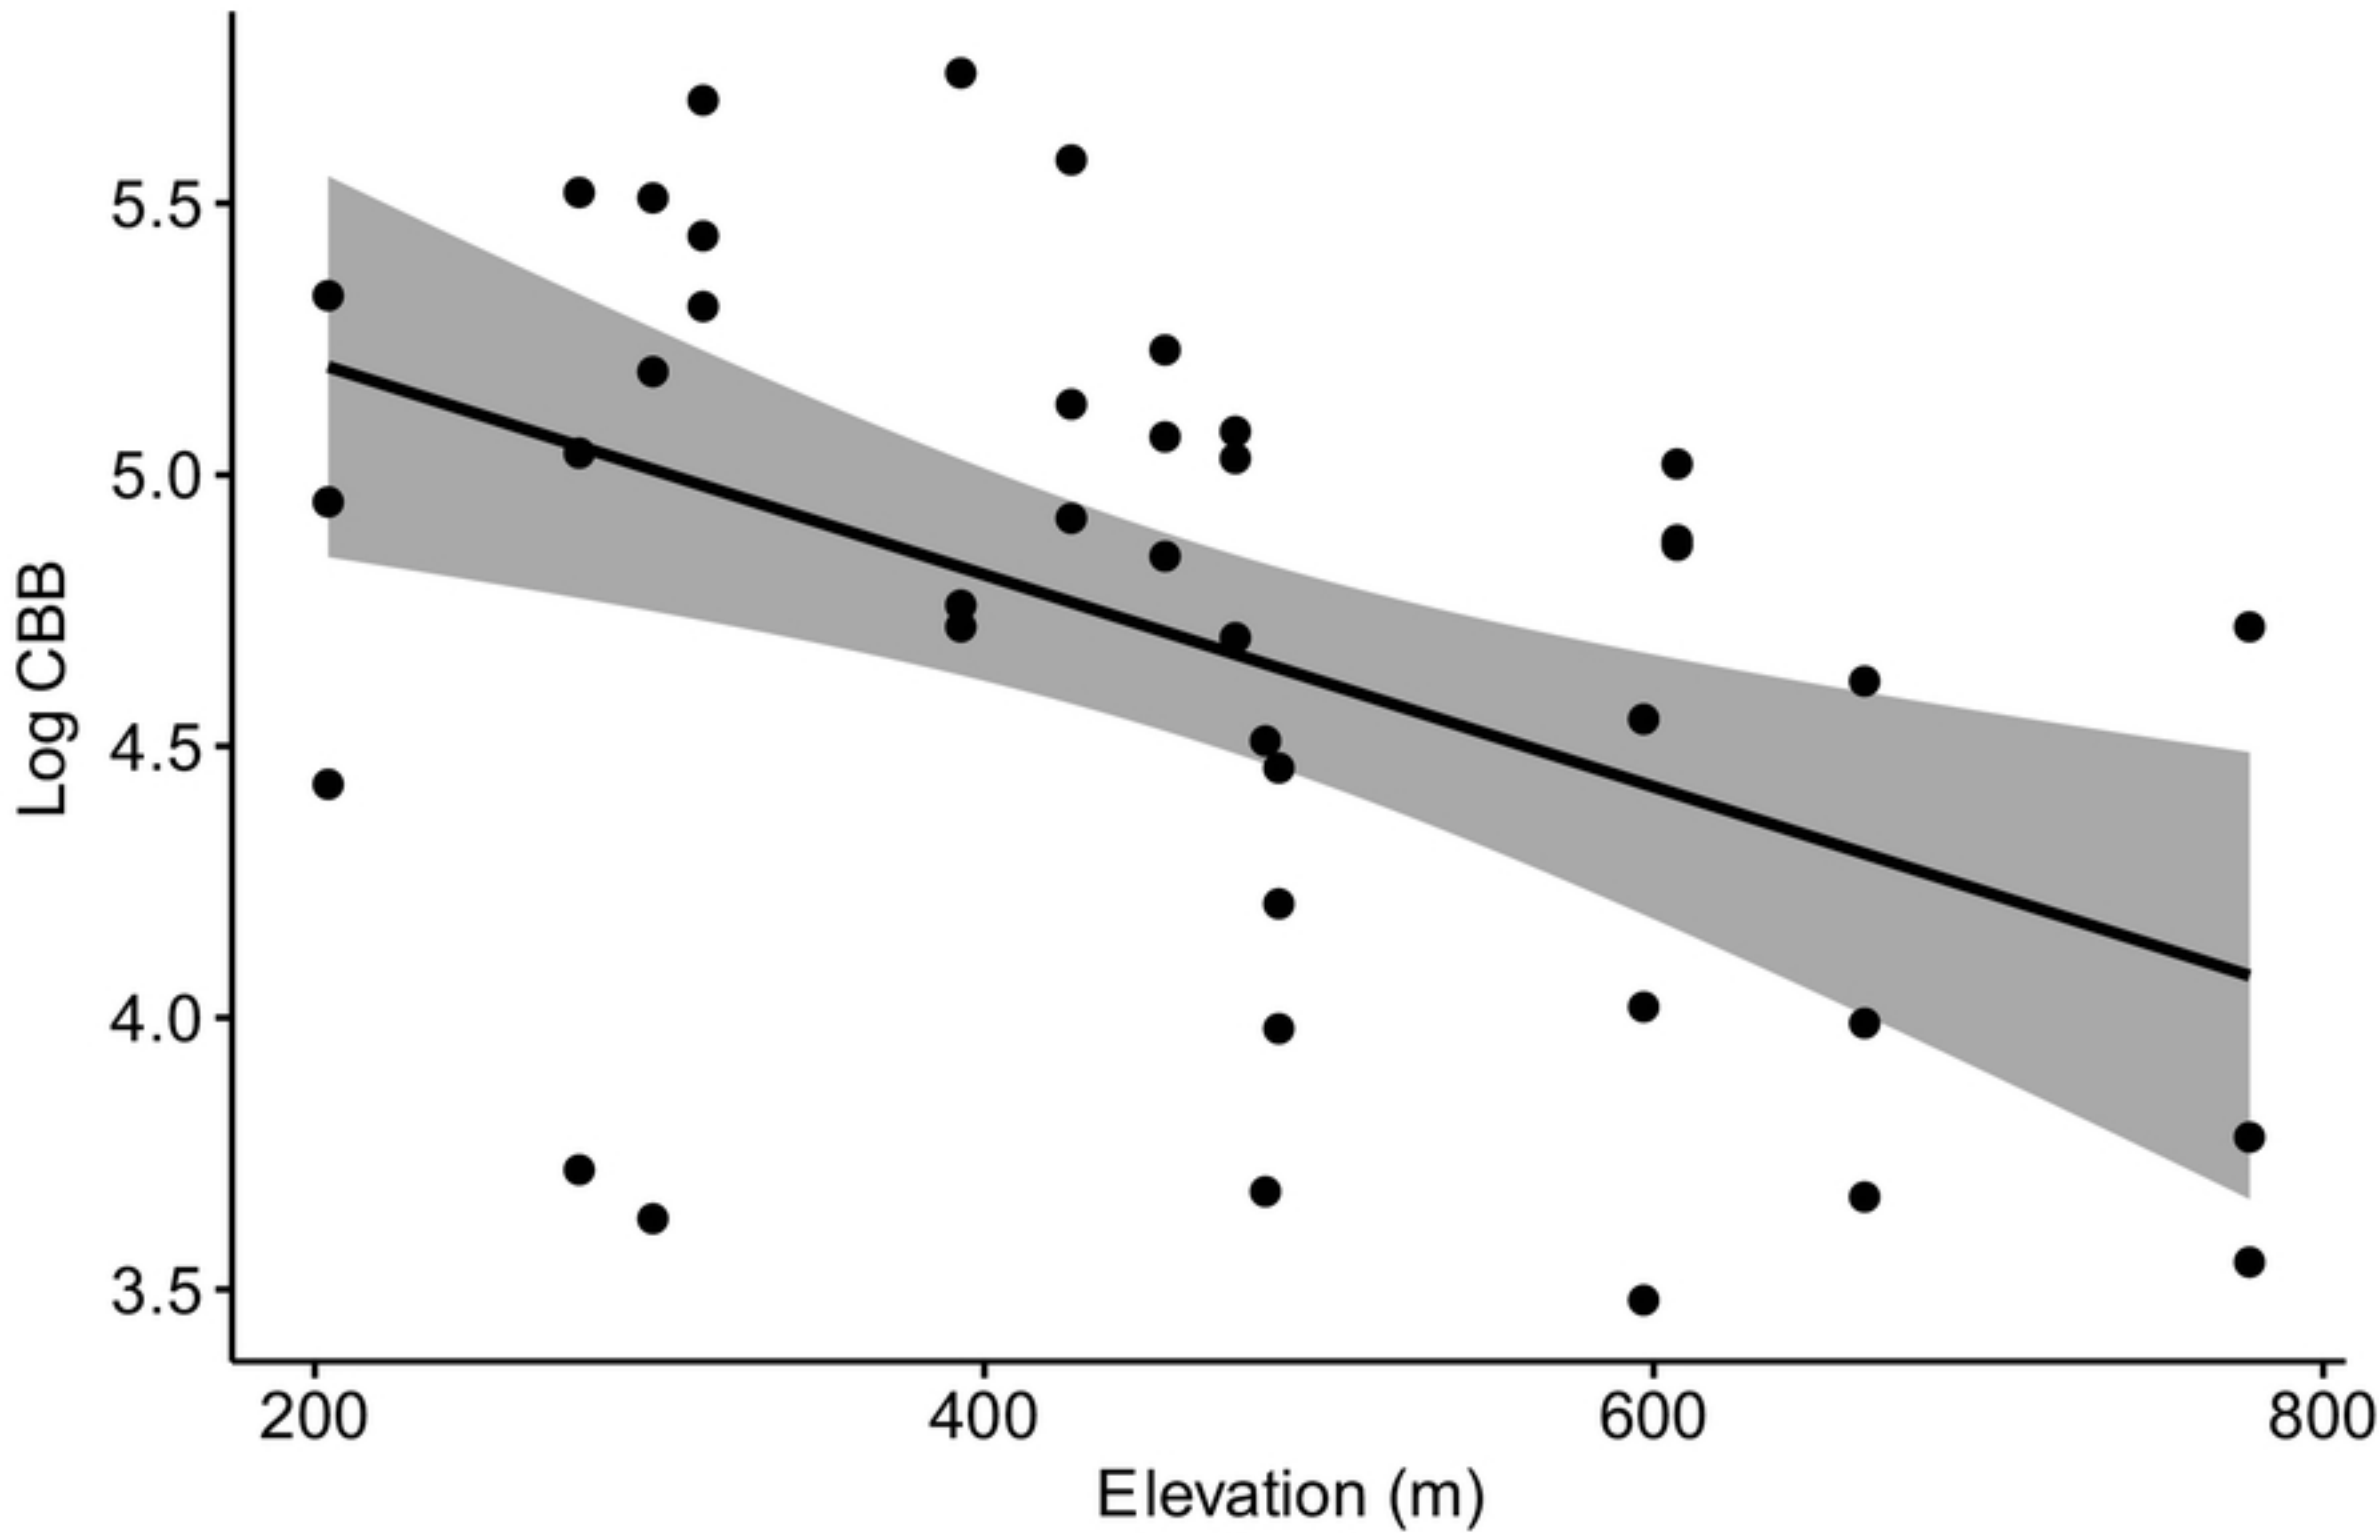

A.

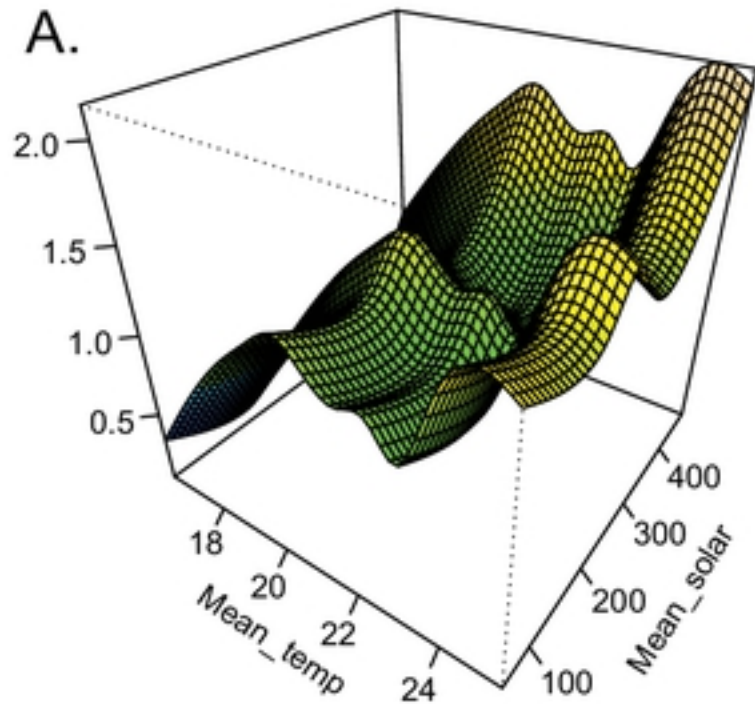

B.

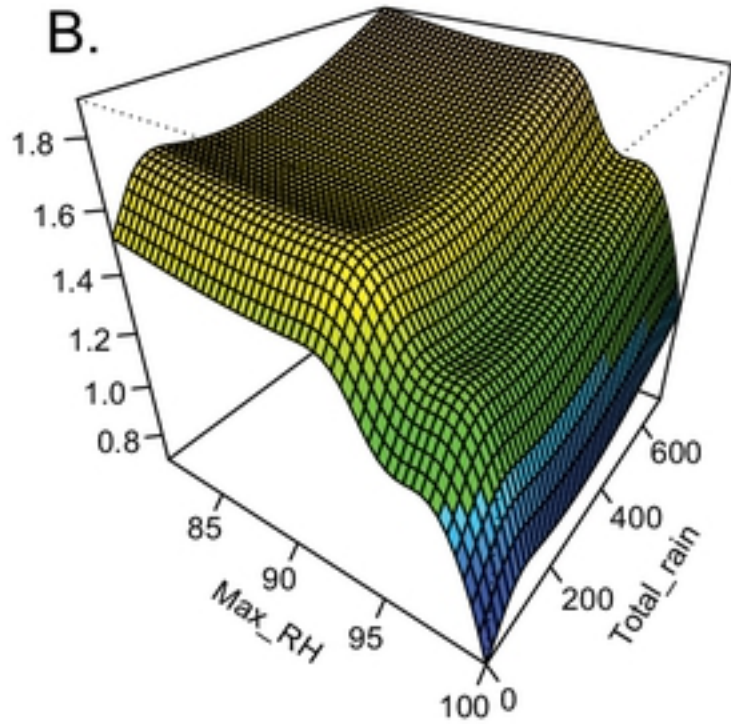

C.

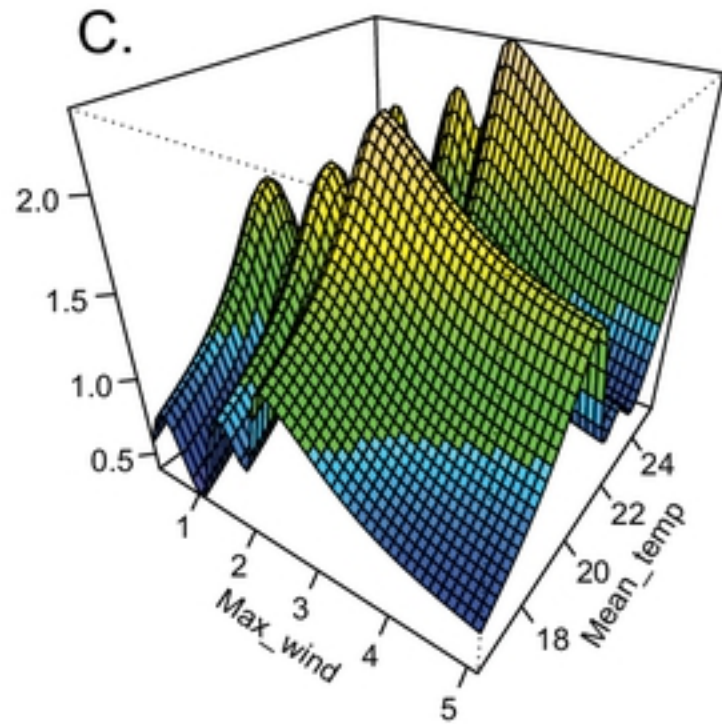

Source: http://biorxiv.org/content/10.1101/2021.09.13.460180v1.full.pdf
